# Supplementary material
Source: ML conference proceedings conference paper supplement (https://openaccess.thecvf.com/content/CVPR2024/html/Dwivedi_TokenHMR_Advancing_Human_CVPR_2024_paper.html)
Supplement: Supplementary file 1 [file Dwivedi_TokenHMR_Advancing_Human_CVPR_2024_supplemental.pdf]

# TokenHMR: Advancing Human Mesh Recovery with a Tokenized Pose Representation

## Supplementary Material

### 1. Introduction

In this supplemental document, we provide more implementation details and discuss limitations of TokenHMR. Please refer to the **supplemental video** for a brief review of the paper and more qualitative results.

### 2. More Implementation Details

#### 2.1. Data Preparation for Tokenizer

For pose tokenization, we use 21 body pose parameters following Vposer [7]. As shown in Tab. 3 of main paper, we evaluate our tokenization in two settings: in-distribution and out-of-distribution. For in-distribution, we train on the training set of AMASS [6] and evaluate on the test set of AMASS. To show the efficacy of tokenization, we also evaluate on an out-of-distribution yoga dataset, MOYO [9]. For training, we use the following datasets: {CMU, KIT, BMLrub, DanceDB, BMLmovi, EyesJapan, BMLhandball, TotalCapture, EKUT, ACCAD, TCDHands, MPI-Limits} with a weighting of {0.14, 0.14, 0.14, 0.06, 0.06, 0.06, 0.06, 0.06, 0.04, 0.04, 0.04, 0.16}, respectively.

#### 2.2. Joint-wise Thresholds for TALS

To establish effective joint-wise thresholds for TALS (Sec. 4.2), we conducted a detailed statistical analysis on the 20221018\_3-8\_250\_batch01hand\_6fps validation subset of the BEDLAM [2] dataset, encompassing over 34k samples of diverse human 3D pose, shape, and camera perspectives. Table 1 presents the threshold distances for each joint used by TALS.

#### 2.3. Augmentations

Data augmentation plays a pivotal role in enhancing the robustness and generalization capabilities of HPS regressors. Hence, following HMR2.0, we perform various augmentations. These include random translations in both  $x$  and  $y$  directions with a factor of 0.02, scaling with a factor of 0.3 and rotations with 30 degrees. Other augmentations include horizontal flipping and color rescaling. We observe that extreme cropping i.e. removing part of the human body limb in random also improves the robustness to occlusion.

### 3. Discussion

#### 3.1. Pose Space Analysis

We analyse the pose space by evaluating reconstruction of OOD poses that are not present in the training set. We do this by training on AMASS and testing on MOYO. The qualitative result is

| 2D Joints     | Threshold | SMPL Joints | Threshold |
|---------------|-----------|-------------|-----------|
| OP Nose       | 0.00850   | Pelvis      | 0.46      |
| OP Neck       | 0.00649   | LHip        | 0.22      |
| OP RShoulder  | 0.00748   | RHip        | 0.21      |
| OP RElbow     | 0.01103   | Spine       | 0.15      |
| OP RWrist     | 0.01356   | LKnee       | 0.33      |
| OP LShoulder  | 0.00742   | RKnee       | 0.30      |
| OP LElbow     | 0.01097   | Thorax      | 0.17      |
| OP LWrist     | 0.01414   | LAnkle      | 0.20      |
| OP MidHip     | 0.00974   | RAnkle      | 0.27      |
| OP RHip       | 0.01127   | Thorax      | 0.12      |
| OP RKnee      | 0.01663   | LToe        | 0.29      |
| OP RAnkle     | 0.00565   | RToe        | 0.28      |
| OP LHip       | 0.01126   | Neck        | 0.24      |
| OP LKnee      | 0.01616   | LCollar     | 0.26      |
| OP LAnkle     | 0.00533   | RCollar     | 0.26      |
| OP REye       | 0.00830   | Jaw         | 0.28      |
| OP LEye       | 0.00831   | LShoulder   | 0.29      |
| OP REar       | 0.00737   | RShoulder   | 0.32      |
| OP LEar       | 0.00743   | LElbow      | 0.35      |
| OP LBigToe    | 0.00544   | RElbow      | 0.35      |
| OP LSmallToe  | 0.00551   | LWrist      | 0.62      |
| OP LHeel      | 0.00536   | RWrist      | 0.59      |
| OP RBigToe    | 0.00565   | LHand       | 0.20      |
| OP RSmallToe  | 0.00582   | RHand       | 0.20      |
| OP RHeel      | 0.00573   |             |           |
| LSP RAnkle    | 0.00554   |             |           |
| LSP RKnee     | 0.01515   |             |           |
| LSP RHip      | 0.00986   |             |           |
| LSP LHip      | 0.00998   |             |           |
| LSP LKnee     | 0.01520   |             |           |
| LSP LAnkle    | 0.00511   |             |           |
| LSP RWrist    | 0.01288   |             |           |
| LSP RElbow    | 0.01106   |             |           |
| LSP RShoulder | 0.00711   |             |           |
| LSP LShoulder | 0.00710   |             |           |
| LSP LElbow    | 0.01092   |             |           |
| LSP LWrist    | 0.01388   |             |           |
| LSP Neck      | 0.00648   |             |           |
| LSP Head Top  | 0.00766   |             |           |
| MPII Pelvis   | 0.00931   |             |           |
| MPII Thorax   | 0.00647   |             |           |
| H36M Spine    | 0.00677   |             |           |
| H36M Jaw      | 0.00744   |             |           |
| H36M Head     | 0.00752   |             |           |

Table 1. Thresholds for 44 2D joints and 24 SMPL joints. 2D joint names start with the skeleton origin, where OP stands for OpenPose [3]. LSP [5], MPII [1], and H36M [4] are the datasets.

shown in Fig. 1 which shows good generalization to the out-of-distribution yoga poses from MOYO [9]. In contrast, we find that noisy test poses are not well recovered.

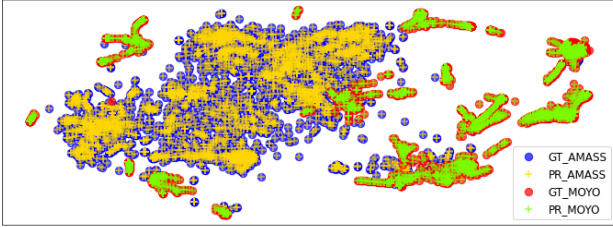

Figure 1. t-SNE visualization of *unseen poses* (3D body joints) reconstructed by our tokenizer trained on AMASS only. We are able to reconstruct the out-of-distribution Yoga poses from MOYO. GT is ground-truth poses and PR is predicted poses.

### 3.2. TALS loss vs Filtering Strategy

Similar to HMR2.0, we employ filtering strategies to ensure high-quality 2D image alignment of the p-GT. Filtering strategies, however, are “all or nothing”; i.e. data samples are either rejected or considered. Our TALS loss is different in that it uses all the filtered pseudo-ground-truth samples up to a threshold, after which the supervision is scaled down. This goes beyond standard filtering and data cleaning pipelines.

## 4. Limitation Discussion

### 4.1. Poor 2D Alignment under Weak-perspective Camera Model

The experimental analysis in Sec. 3 shows that using existing flawed camera projection models results in overfitting to 2D keypoints and that this leads to learning biased poses. To avoid this issue, we design a lenient TALS supervision training strategy and incorporate prior knowledge through our token-based pose representation. As shown in Fig. 2 a), with the combination of loose 2D supervision using TALS and built-in prior in representation, TokenHMR is able to estimate reasonable 3D poses but these do not always align well in 2D image when there is foreshortening. As expected under the weak-perspective camera model, the more obvious the perspective distortion, the worse the 2D alignment.

### 4.2. Failure Cases

In this work, we introduce TokenHMR to reduce camera/pose bias and alleviate the ambiguity with a tokenized pose prior. However, TokenHMR still has some limitations that could be further explored in future work.

As shown in Fig. 2 b), foreshortening remains challenging without a better camera model. In cases like Fig. 2 c), the global orientation is ambiguous when only considering body cues. We may need to exploit more cues from the face and the feet to determine the correct global orientation. Future work could try to extend TokenHMR to full-body pose estimation (i.e. SMPL-X) to address this issue.

## 5. Future Work

Future work should, obviously, address the camera projection problem directly by recovering more accurate camera estimates.

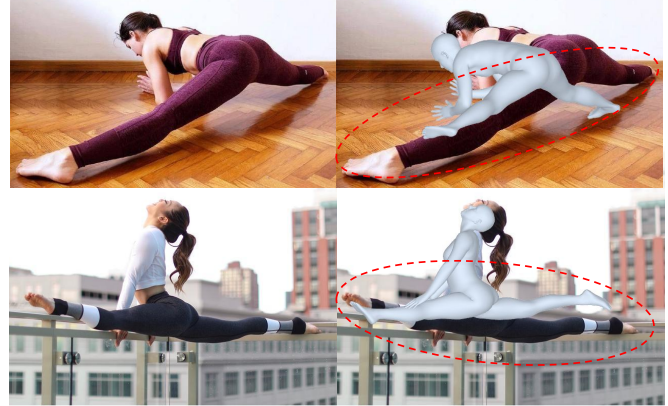

a) Due to the loose supervision of TALS, our prediction does not align well in 2D under weak-perspective camera.

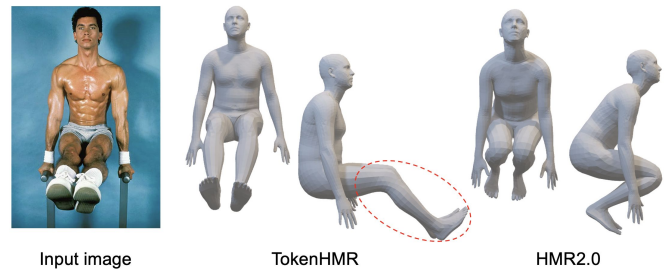

b) Depth-wise ambiguity is still very challenging.

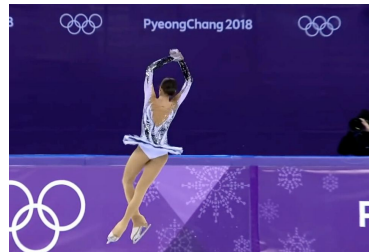

c) Global orientation estimation sometimes fails because facial and foot cues are not thoroughly explored.

Figure 2. 2D alignment problem and failure cases.

Even with such improvements, we anticipate that the token representation retains value as it consistently improves performance across varied test scenarios. A promising next step is to extend the tokenization over time. Recent work on generating human motion from text exploits tokenized representations of human motions [8]. Looking further ahead, an intriguing direction for future research involves exploring the application of our token-based pose representation with Large Language Models (LLMs). The discrete, robust nature of our pose tokens, designed for 3D human pose estimation, presents an opportunity to bridge the gap between computer vision and natural language processing.

## References

[1] Mykhaylo Andriluka, Leonid Pishchulin, Peter Gehler, and Bernt Schiele. 2d human pose estimation: New benchmark and state of the art analysis. In *Computer Vision and Pattern*

- Recognition (CVPR)*, 2014. [1](#)
- [2] Michael J Black, Priyanka Patel, Joachim Tesch, and Jinlong Yang. Bedlam: A synthetic dataset of bodies exhibiting detailed lifelike animated motion. In *CVPR*, pages 8726–8737, 2023. [1](#)
  - [3] Z. Cao, G. Hidalgo Martinez, T. Simon, S. Wei, and Y. A. Sheikh. Openpose: Realtime multi-person 2d pose estimation using part affinity fields. *IEEE Transaction on Pattern Analysis and Machine Intelligence (TPAMI)*, 2019. [1](#)
  - [4] Catalin Ionescu, Dragos Papava, Vlad Olaru, and Cristian Sminchisescu. Human3.6M: Large scale datasets and predictive methods for 3D human sensing in natural environments. *Transactions on Pattern Analysis and Machine Intelligence (TPAMI)*, 2014. [1](#)
  - [5] Sam Johnson and Mark Everingham. Learning effective human pose estimation from inaccurate annotation. In *Computer Vision and Pattern Recognition (CVPR)*, 2011. [1](#)
  - [6] Naureen Mahmood, Nima Ghorbani, Nikolaus F. Troje, Gerard Pons-Moll, and Michael J. Black. AMASS: Archive of motion capture as surface shapes. In *International Conference on Computer Vision (ICCV)*, 2019. [1](#)
  - [7] Georgios Pavlakos, Vasileios Choutas, Nima Ghorbani, Timo Bolkart, Ahmed A. A. Osman, Dimitrios Tzionas, and Michael J. Black. Expressive body capture: 3D hands, face, and body from a single image. In *Computer Vision and Pattern Recognition (CVPR)*, 2019. [1](#)
  - [8] Guy Tevet, Sigal Raab, Brian Gordon, Yoni Shafir, Daniel Cohen-or, and Amit Haim Bermano. Human motion diffusion model. In *The Eleventh International Conference on Learning Representations*, 2023. [2](#)
  - [9] Shashank Tripathi, Lea Müller, Chun-Hao P. Huang, Taheri Omid, Michael J. Black, and Dimitrios Tzionas. 3D human pose estimation via intuitive physics. In *Computer Vision and Pattern Recognition (CVPR)*, 2023. [1](#)
